# Supplementary material
Source: publisher site journal article supplement (https://www.spandidos-publications.com/4573/downloadSupplementary)

Figure S1. Cytokine profile assay of the supernatant of the siChemR23 and siFPR2 systems was determined using the CBA kit and cytokine beads. (A) mRNA and (B) protein levels of ChemR23 and FPR2 after siRNA treatment were measured using RT-qPCR and flow cytometry, respectively. (C) The secreted inflammatory cytokine IL-6 was measured after treatment with siChemR23 and siFPR2 by ELISA. #P<0.05 vs. the control group, \*P<0.05 vs. the LPS group. Si, short interfering; neg, negative; ChemR23, chemokine like receptor 1; FPR2, formyl peptide receptor 2; LPS, lipopolysaccharide; diHEP-DPA, 7S,15R-dihydroxy-16S,17S-epoxy-docosapentaenoic; ns, not significant; RT-qPCR, reverse transcription-quantitative PCR.

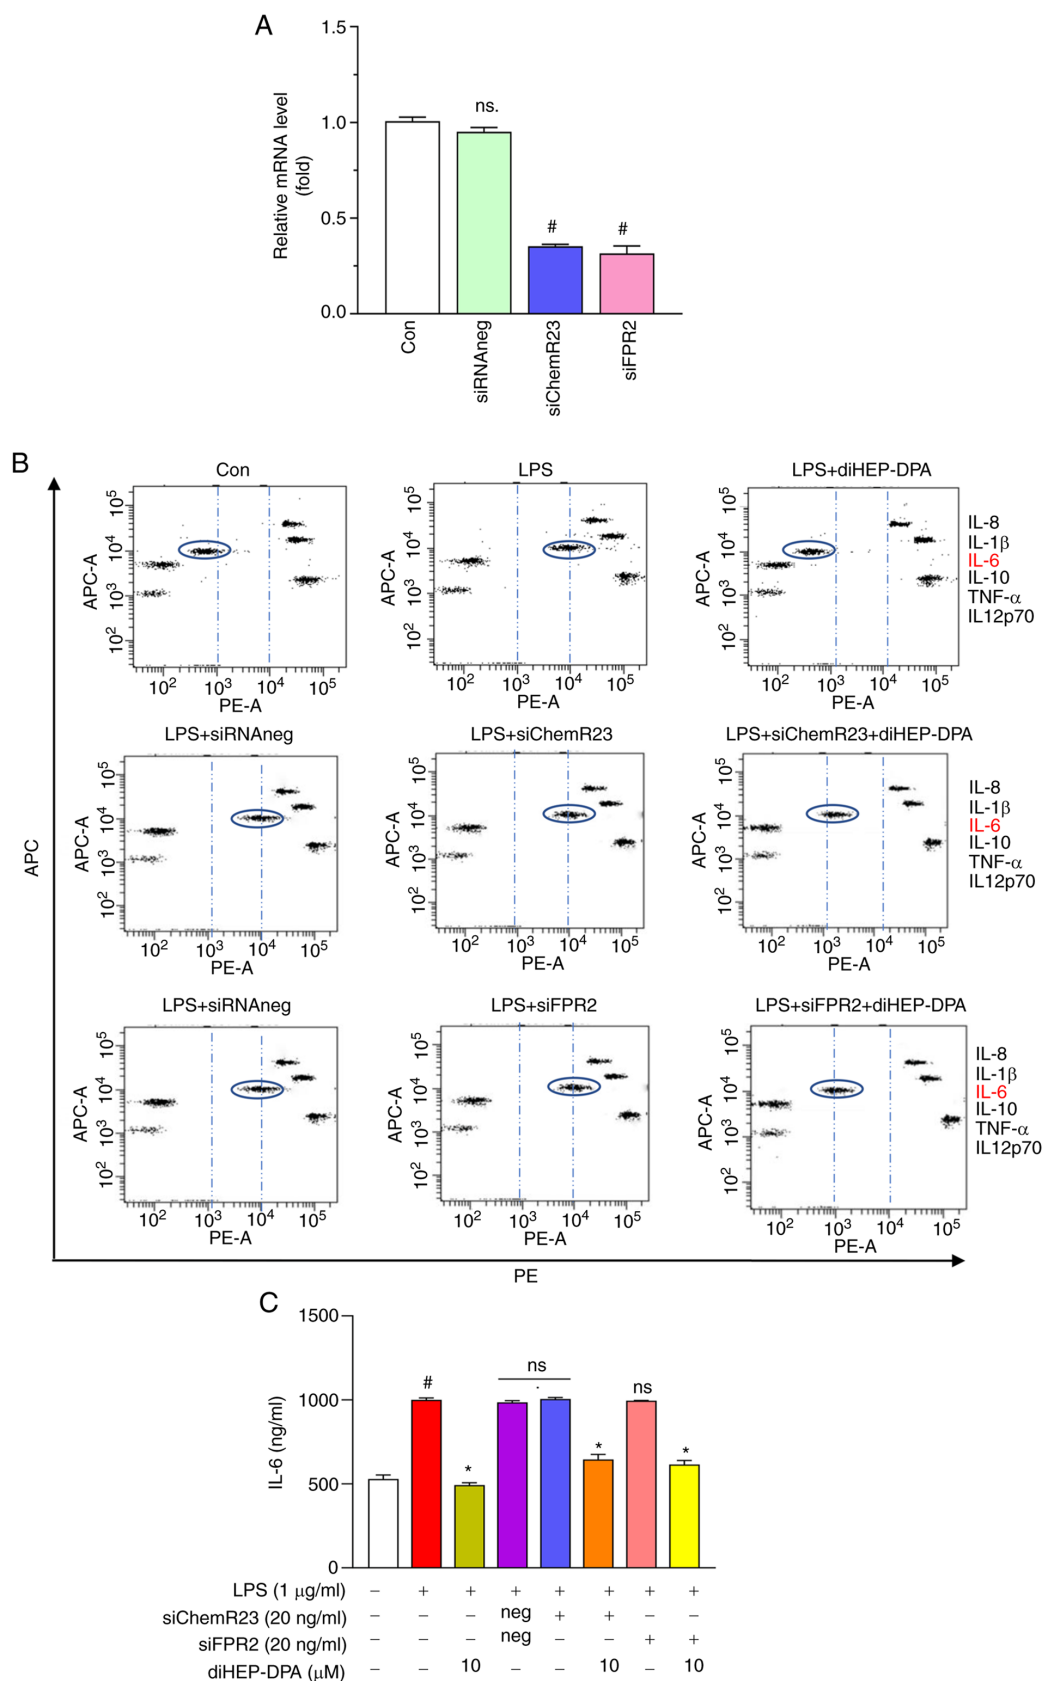

Supplement: Supplementary file 1 [file downloadSupplementary]
